# Supplementary material
Source: PubMed Central journal article supplement (PMC3612988)
Supplement: NIHMS443214-supplement-supplement_1.pdf [file NIHMS443214-supplement-supplement_1.pdf]

Supplemental Data:

Table S1

Table S2

**Table S1. SGs and ASGs are reduced in seeds from *ugt80A2,B1* mutants of *Arabidopsis*.** Mass spectral signals after normalization to internal standards from ESI-MS/MS analysis of SGs and ASGs are shown for wild-type and *ugt80A2,B1* seeds. SGs and ASGs containing sitosterol, campesterol, and stigmasterol are indicated separately. Sitosteryl, campesteryl, and stigmasteryl SGs and ASGs as fractions of the total SGs and ASGs, respectively, are shown in parentheses. Fractions of each ASG type (16:0, 18:3, 18:2, 18:1) of the total ASG for each sterol are given in parentheses in italics. SG and ASG as fractions of the total sterol conjugates are shown in parentheses in bold. Standard deviations (sd) are indicated. Total SG and total ASG are the sums of sitosteryl, campesteryl and stigmasteryl glucosides. The values indicate significant differences in all SG and ASG compounds analyzed in wild-type versus *ugt80A2,B1*:  $P < 0.005$  ( $n = 5$  biological replicates). These data are represented in Figure 5.

|                     | wild-type            | sd     | <i>ugt80A2,B1</i>     | sd     | Ave. fold difference |
|---------------------|----------------------|--------|-----------------------|--------|----------------------|
| <b>Sitosteryl</b>   |                      |        |                       |        |                      |
| SG                  | 2.60 (0.77)          | 0.33   | 0.38 (0.80)           | 0.21   | 7                    |
| ASG total           | 0.33 (0.72)          | 0.06   | 0.017 (0.87)          | 0.007  | 19                   |
| 16:0 SG             | 0.18 (0.56)          | 0.04   | 0.012 (0.71)          | 0.003  | 15                   |
| 18:3 SG             | 0.031 (0.09)         | 0.005  | 0.0004 (0.02)         | 0.0005 | 78                   |
| 18:2 SG             | 0.033 (0.10)         | 0.005  | 0.0026 (0.15)         | 0.0025 | 13                   |
| 18:1 SG             | 0.080 (0.24)         | 0.013  | 0.0020 (0.12)         | 0.0019 | 41                   |
| <b>Campesteryl</b>  |                      |        |                       |        |                      |
| SG                  | 0.49 (0.14)          | 0.05   | 0.038 (0.08)          | 0.024  | 13                   |
| ASG total           | 0.11 (0.25)          | 0.02   | 0.0019 (0.10)         | 0.0007 | 61                   |
| 16:0 SG             | 0.071 (0.62)         | 0.018  | 0.0009 (0.46)         | 0.0005 | 83                   |
| 18:3 SG             | 0.0071 (0.06)        | 0.0017 | 0.0004 (0.19)         | 0.0004 | 20                   |
| 18:2 SG             | 0.0095 (0.08)        | 0.0021 | 0.0003 (0.14)         | 0.0001 | 37                   |
| 18:1 SG             | 0.027 (0.23)         | 0.004  | 0.0004 (0.21)         | 0.0003 | 67                   |
| <b>Stigmasteryl</b> |                      |        |                       |        |                      |
| SG                  | 0.31 (0.09)          | 0.06   | 0.055(0.12)           | 0.030  | 6                    |
| ASG total           | 0.011 (0.03)         | 0.0026 | 0.0006 (0.03)         | 0.0004 | 18                   |
| 16:0 SG             | 0.0044 (0.39)        | 0.0017 | 0.0002 (0.30)         | 0.0003 | 23                   |
| 18:3 SG             | 0.0015 (0.13)        | 0.0008 | 0.0001 (0.11)         | 0.0001 | 23                   |
| 18:2 SG             | 0.0020 (0.18)        | 0.0006 | 0.0002 (0.31)         | 0.0003 | 10                   |
| 18:1 SG             | 0.0035 (0.30)        | 0.0007 | 0.0002 (0.28)         | 0.0004 | 20                   |
| <b>Total SG</b>     | 3.40 ( <b>0.88</b> ) | 0.43   | 0.47 ( <b>0.96</b> )  | 0.26   | 7                    |
| <b>Total ASG</b>    | 0.45 ( <b>0.12</b> ) | 0.08   | 0.020 ( <b>0.04</b> ) | 0.007  | 23                   |
| <b>SG + ASG</b>     | 3.85                 | 0.49   | 0.49                  | 0.27   | 8                    |

**Table S2. Normalized mass spectral signals for phospholipids versus sterol glycolipids.** Phosphatidylcholine (PtdCho) and phosphatidylethanolamine (PtdEtn) mass spectral signals from wild-type and *ugt80A2,B1* seed extracts were determined in comparison to SG and ASG. While mass spectral signals per mg seed weight significantly decreased ( $P < 0.005$ ) for SG and ASG lipids in *ugt80A2,B1* mutants relative to wild-type, mass spectral signals for PtdCho and PtdEtn lipids are not statistically different. Normalized mass spectral signal averages and standard deviations are indicated for  $n = 5$  biological replicates.

| Lipid species | Normalized mass spectral signal per mg seed weight |                   | P value   |
|---------------|----------------------------------------------------|-------------------|-----------|
|               | wild-type                                          | <i>ugt80A2,B1</i> |           |
| PtdCho        | 45.0 ± 8.3                                         | 62.4 ± 11.8       | 0.03      |
| PtdEtn        | 12.9 ± 1.5                                         | 12.8 ± 1.0        | 0.96      |
| SG            | 3.40 ± 0.43                                        | 0.47 ± 0.26       | 0.0000012 |
| ASG           | 0.45 ± 0.08                                        | 0.02 ± 0.01       | 0.0000021 |
